# Supplementary material for: Carbon-containing pyrite spherules: mineral biosignatures in black smokers?
Source: Copernicus journal article supplement (doi:10.5194/ejm-36-813-2024), 2024-09-18
Supplement: Supplementary file 1 [file ejm-36-813-2024-supplement.pdf]

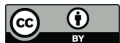

*Supplement of*

## **Carbon-containing pyrite spherules: mineral biosignatures in black smokers?**

**Chloé Truong et al.**

*Correspondence to:* Chloé Truong ([ctruong@imm.cnrs.fr](mailto:ctruong@imm.cnrs.fr)) and François Guyot ([francois.guyot@mnhn.fr](mailto:francois.guyot@mnhn.fr))

The copyright of individual parts of the supplement might differ from the article licence.

**Table S1** | Indexing of peaks identified on the diffractograms obtained by X-ray diffraction of the samples from different parts of the chimney's wall: internal (Int), middle (Mid) and external portions (Ext). Each identified peak is labelled with Bianchite (COD ID: 9014480), Marcasite (COD ID: 1011013), Pyrite (COD ID: 9015842), Sphalerite (COD ID: 1538617) or Chalcopyrite (COD ID: 9015636). The d-spacing of each peak was measured manually (no uncertainties calculated).

| <b>Internal portion (Int)</b> |                                 |                                |
|-------------------------------|---------------------------------|--------------------------------|
| <b>d-spacing (Å)</b>          | <b>Relative intensity (I %)</b> | <b><i>h k l</i></b>            |
| 4.72                          | 2                               | [1 0 1] 4.7138<br>Chalcopyrite |
| 3.13                          | 6                               | [1 1 1] 3.1258<br>Pyrite       |
| 3.05                          | 100                             | [1 1 2] 3.0368<br>Chalcopyrite |
| 2.91                          | 1                               | [1 0 3] 2.9025<br>Chalcopyrite |
| 2.71                          | 3                               | [2 0 0] 2.7070<br>Pyrite       |
| 2.65                          | 3                               | [2 0 0] 2.6428<br>Chalcopyrite |
| 2.61                          | 1                               | [0 0 4] 2.6048<br>Chalcopyrite |
| 2.43                          | 3                               | [2 1 0] 2.4212<br>Pyrite       |
| 2.31                          | 2                               | [2 1 1] 2.3052<br>Chalcopyrite |
| 2.21                          | 2                               | [2 1 1] 2.2103<br>Pyrite       |
| 1.92                          | 5                               | [2 2 0] 1.9141<br>Pyrite       |
| 1.87                          | 10                              | [2 2 0] 1.8688<br>Chalcopyrite |
| 1.86                          | 63                              | [2 0 4] 1.8552<br>Chalcopyrite |
| 1.74                          | 2                               | [3 0 1] 1.7372<br>Chalcopyrite |
| 1.63                          | 4                               | [3 1 1] 1.6324<br>Pyrite       |
| 1.59                          | 24                              | [3 1 2] 1.5916<br>Chalcopyrite |

|      |   |                                |
|------|---|--------------------------------|
| 1.58 | 6 | [1 1 6] 1.5748<br>Chalcopyrite |
| 1.56 | 1 | [2 2 2] 1.5629<br>Pyrite       |
| 1.52 | 2 | [2 2 4] 1.5184<br>Chalcopyrite |
| 1.50 | 1 | [3 0 2] 1.5016<br>Pyrite       |
| 1.45 | 2 | [3 2 1] 1.4470<br>Pyrite       |
| 1.32 | 3 | [4 0 0] 1.3214<br>Chalcopyrite |
| 1.30 | 2 | [0 0 8] 1.3024<br>Chalcopyrite |

| <b>Middle portion (Mid)</b> |                                |                                |
|-----------------------------|--------------------------------|--------------------------------|
| <b>d-spacing (Å)</b>        | <b>Relative intensity (I%)</b> | <b><i>h k l</i></b>            |
| 4.70                        | 2                              | [1 0 1] 4.7138<br>Chalcopyrite |
| 3.13                        | 13                             | [1 1 1] 3.1258<br>Pyrite       |
| 3.12                        | 24                             | [1 1 1] 3.1200<br>Sphalerite   |
| 3.03                        | 100                            | [1 1 2] 3.0368<br>Chalcopyrite |
| 2.90                        | 2                              | [1 0 3] 2.9025<br>Chalcopyrite |
| 2.70                        | 16                             | [2 0 0] 2.7070<br>Pyrite       |
| 2.69                        | 5                              | [2 0 0] 2.7020<br>Sphalerite   |
| 2.64                        | 4                              | [2 0 0] 2.6428<br>Chalcopyrite |
| 2.60                        | 2                              | [0 0 4] 2.6048<br>Chalcopyrite |
| 2.42                        | 13                             | [2 1 0] 2.4212<br>Pyrite       |
| 2.31                        | 3                              | [2 1 1] 2.3052<br>Chalcopyrite |

|      |    |                                |
|------|----|--------------------------------|
| 2.21 | 9  | [2 1 1] 2.2103<br>Pyrite       |
| 1.95 | 1  | [2 1 3] 1.9541<br>Chalcopyrite |
| 1.91 | 8  | [2 2 0] 1.9141<br>Pyrite       |
| 1.91 | 13 | [2 2 0] 1.9106<br>Sphalerite   |
| 1.87 | 15 | [2 2 0] 1.8688<br>Chalcopyrite |
| 1.85 | 27 | [2 0 4] 1.8552<br>Chalcopyrite |
| 1.76 | 3  | [3 0 1] 1.7372<br>Chalcopyrite |
| 1.63 | 14 | [3 1 1] 1.6324<br>Pyrite       |
| 1.63 | 10 | [3 1 1] 1.6294<br>Sphalerite   |
| 1.59 | 24 | [3 1 2] 1.5916<br>Chalcopyrite |
| 1.58 | 9  | [1 1 6] 1.5748<br>Chalcopyrite |
| 1.56 | 3  | [2 2 2] 1.5629<br>Pyrite       |
| 1.56 | 1  | [2 2 2] 1.5600<br>Sphalerite   |
| 1.52 | 2  | [2 2 4] 1.5184<br>Chalcopyrite |
| 1.50 | 3  | [3 0 2] 1.5016<br>Pyrite       |
| 1.45 | 4  | [3 2 1] 1.4470<br>Pyrite       |
| 1.35 | 1  | [4 0 0] 1.3510<br>Sphalerite   |
| 1.32 | 3  | [4 0 0] 1.3214<br>Chalcopyrite |
| 1.30 | 2  | [0 0 8] 1.3024<br>Chalcopyrite |

| <b>External portion (Ext)</b> |                                 |                              |
|-------------------------------|---------------------------------|------------------------------|
| <b>d-spacing (Å)</b>          | <b>Relative intensity (I %)</b> | <b><i>h k l</i></b>          |
| 5.98                          | 3                               | [0 0 4] 6.0041<br>Bianchite  |
| 5.83                          | 8                               | [1 1 0] 5.8436<br>Bianchite  |
| 5.55                          | 2                               | [1 1 1] 5.5678<br>Bianchite  |
| 5.42                          | 10                              | [1 1 -2] 5.4441<br>Bianchite |
| 5.07                          | 6                               | [1 1 2] 5.0834<br>Bianchite  |
| 4.92                          | 7                               | [2 0 0] 4.9363<br>Bianchite  |
| 4.82                          | 5                               | [2 0 -2] 4.8216<br>Bianchite |
| 4.53                          | 6                               | [1 1 3] 4.5358<br>Bianchite  |
| 4.37                          | 29                              | [1 1 -4] 4.3825<br>Bianchite |
| 4.34                          | 3.6                             | [2 0 2] 4.3465<br>Bianchite  |
| 4.12                          | 5                               | [2 0 -4] 4.1217<br>Bianchite |
| 4.01                          | 15                              | [1 1 4] 4.0167<br>Bianchite  |
| 3.87                          | 2                               | [1 1 -5] 3.8799<br>Bianchite |
| 3.61                          | 8                               | [0 2 0] 3.6250<br>Bianchite  |
| 3.58                          | 3                               | [0 2 1] 3.5844<br>Bianchite  |
| 3.56                          | 6                               | [2 0 4] 3.5618<br>Bianchite  |
| 3.43                          | 12                              | [1 1 0] 3.4313<br>Marcasite  |
| 3.13                          | 2                               | [1 1 1] 3.1258<br>Pyrite     |

|      |     |                                |
|------|-----|--------------------------------|
| 3.12 | 100 | [1 1 1] 3.1200<br>Sphalerite   |
| 3.03 | 18  | [1 1 2] 3.0368<br>Chalcopyrite |
| 3.00 | 6   | [3 1 -2] 3.0034<br>Bianchite   |
| 2.99 | 6   | [3 1 0] 2.9966<br>Bianchite    |
| 2.92 | 4   | [2 2 0] 2.9218<br>Bianchite    |
| 2.91 | 7   | [2 0 6] 2.9071<br>Bianchite    |
| 2.90 | 5   | [2 2 -2] 2.8975<br>Bianchite   |
| 2.88 | 2   | [2 2 1] 2.8706<br>Bianchite    |
| 2.79 | 2   | [2 2 2] 2.7839<br>Bianchite    |
| 2.71 | 33  | [0 2 0] 2.7070<br>Marcasite    |
| 2.71 | 35  | [2 0 0] 2.7070<br>Pyrite       |
| 2.70 | 24  | [2 0 0] 2.7020<br>Sphalerite   |
| 2.69 | 27  | [1 0 1] 2.6890<br>Marcasite    |
| 2.58 | 3   | [1 1 8] 2.5806<br>Bianchite    |
| 2.52 | 3   | [1 1 -9] 2.5113<br>Bianchite   |
| 2.49 | 2   | [4 0 -2] 2.4909<br>Bianchite   |
| 2.45 | 3   | [2 2 -6] 2.4642<br>Bianchite   |
| 2.42 | 20  | [2 1 0] 2.4212<br>Pyrite       |
| 2.41 | 16  | [1 1 1] 2.4083<br>Marcasite    |

|      |    |                                |
|------|----|--------------------------------|
| 2.31 | 14 | [1 2 0] 2.3107<br>Marcasite    |
| 2.28 | 3  | [3 1 -8] 2.2788<br>Bianchite   |
| 2.21 | 13 | [2 1 1] 2.2103<br>Pyrite       |
| 2.05 | 2  | [2 1 0] 2.0524<br>Marcasite    |
| 2.01 | 2  | [4 2 -4] 2.0074<br>Bianchite   |
| 1.99 | 4  | [3 1 8] 1.9918<br>Bianchite    |
| 1.92 | 55 | [2 2 0] 1.9141<br>Pyrite       |
| 1.91 | 38 | [2 2 0] 1.9106<br>Sphalerite   |
| 1.91 | 24 | [1 2 1] 1.9077<br>Marcasite    |
| 1.87 | 5  | [2 2 0] 1.8688<br>Chalcopyrite |
| 1.86 | 4  | [4 2 4] 1.8640<br>Bianchite    |
| 1.85 | 4  | [2 0 4] 1.8552<br>Chalcopyrite |
| 1.76 | 14 | [2 1 1] 1.7545<br>Marcasite    |
| 1.71 | 2  | [2 2 0] 1.7156<br>Marcasite    |
| 1.69 | 4  | [0 0 2] 1.6905<br>Marcasite    |
| 1.67 | 5  | [1 3 0] 1.6716<br>Marcasite    |
| 1.63 | 35 | [3 1 1] 1.6324<br>Pyrite       |
| 1.63 | 23 | [3 1 1] 1.6294<br>Sphalerite   |
| 1.59 | 8  | [0 3 1] 1.5921<br>Marcasite    |

|      |   |                                |
|------|---|--------------------------------|
| 1.59 | 7 | [3 1 2] 1.5916<br>Chalcopyrite |
| 1.58 | 2 | [1 1 6] 1.5748<br>Chalcopyrite |
| 1.56 | 3 | [2 2 2] 1.5629<br>Pyrite       |
| 1.56 | 4 | [2 2 2] 1.5600<br>Sphalerite   |
| 1.53 | 2 | [2 2 1] 1.5299<br>Marcasite    |
| 1.52 | 2 | [1 1 2] 1.5164<br>Marcasite    |
| 1.50 | 7 | [3 0 2] 1.5016<br>Pyrite       |
| 1.50 | 4 | [1 3 1] 1.4985<br>Marcasite    |
| 1.45 | 5 | [3 2 1] 1.4470<br>Pyrite       |
| 1.43 | 2 | [0 2 2] 1.4339<br>Marcasite    |
| 1.43 | 3 | [3 1 0] 1.4264<br>Marcasite    |
| 1.37 | 3 | [1 2 2] 1.3644<br>Marcasite    |
| 1.35 | 5 | [4 0 0] 1.3510<br>Sphalerite   |



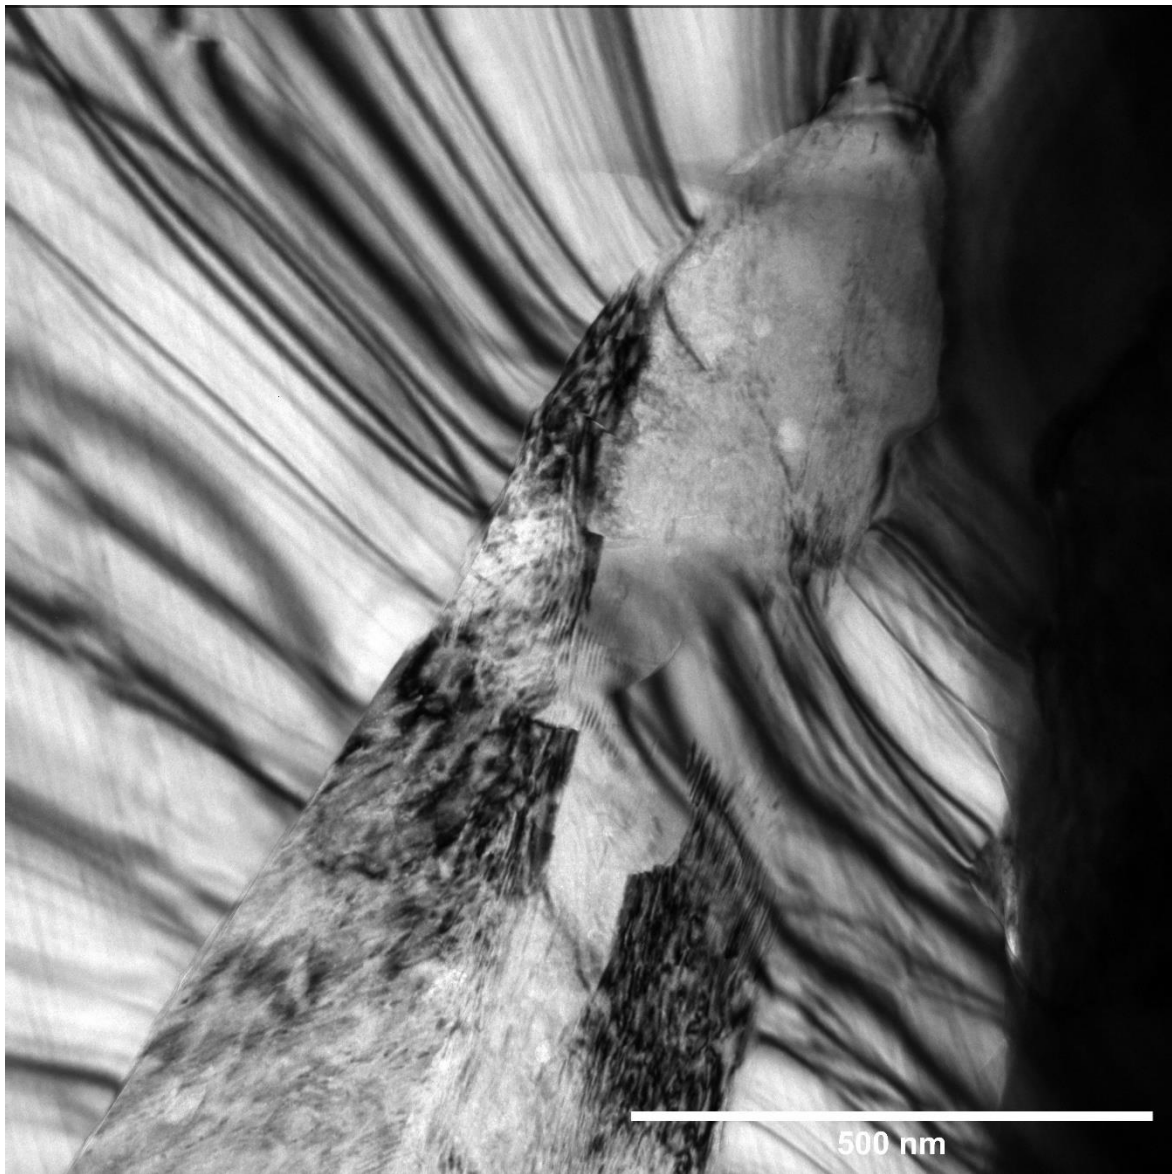

**Figure S1** | Micrometric ZnS inclusion into pyrite. The inclusion appears as a single crystal of sphalerite.

**Table S2** | Elemental composition (CHNS) given in mass fraction of TAG hydrothermal vent samples corresponding to different parts of the lead: interior (Int), middle (Mid), exterior (Ext). Uncertainties ( $\pm$ ) on the reported values are given considering reproducibility to the hundredth on a measurement triplicate. Also shown are the [C]<sub>STXM</sub> values providing a qualitative estimation of the carbon content of the pyrites (note that it is not a true concentration).

|     | Mass fraction of C % | Mass fraction of H % | Mass fraction of N % | Mass fraction of S% | Mass fraction of others % (calculated) | [C] <sub>STXM</sub> |
|-----|----------------------|----------------------|----------------------|---------------------|----------------------------------------|---------------------|
| Int | 0.08 (2)             | 0.05 (4)             | 0                    | 32.40 (5)           | 67.47                                  | 1.6                 |
| Mid | 0.14 (2)             | 0.05 (2)             | 0                    | 37.50 (9)           | 62.31                                  | 2.6                 |
| Ext | 0.21 (9)             | 0.08 (2)             | 0                    | 40.00 (9)           | 59.71                                  | 7.6 (ExtA)          |
|     |                      |                      |                      |                     |                                        | 8.8 (ExtB)          |
